# Supplementary material for: Identification of Nutritional Factors to Evaluate Periodontal Clinical Parameters in Patients with Systemic Diseases
Source: MDPI journal article supplement (doi:10.3390/nu15020365), 2023-01-11
Supplement: s1 [file s1]

**Table S1.** Questionnaire of lifestyle habits.

| Questionnaire of lifestyle habits                                                                          |                  |               |                     |                     |                |                  |    |
|------------------------------------------------------------------------------------------------------------|------------------|---------------|---------------------|---------------------|----------------|------------------|----|
| We ask your dietary habit in latest approximately one month.                                               |                  |               |                     |                     |                |                  |    |
| There are a lot of items, please answer the questions with first impression.                               |                  |               |                     |                     |                |                  |    |
| How often did have the foods the following a) ~ w) in latest one month?                                    |                  |               |                     |                     |                |                  |    |
| Please choose suitable one number in each item based on the frequencies and put O, respectively.           |                  |               |                     |                     |                |                  |    |
|                                                                                                            | Twice ≤<br>a day | Once<br>a day | 4~6 times<br>a week | 2~3 times<br>a week | Once<br>a week | < Once<br>a week | No |
| a) Rice                                                                                                    | 1                | 2             | 3                   | 4                   | 5              | 6                | 7  |
| b) Bread                                                                                                   | 1                | 2             | 3                   | 4                   | 5              | 6                | 7  |
| c) Noodle                                                                                                  | 1                | 2             | 3                   | 4                   | 5              | 6                | 7  |
| d) Chicken<br>(include minced meat)                                                                        | 1                | 2             | 3                   | 4                   | 5              | 6                | 7  |
| e) Pork, Beef, Mutton<br>(include minced meat)                                                             | 1                | 2             | 3                   | 4                   | 5              | 6                | 7  |
| f) Processed meat                                                                                          | 1                | 2             | 3                   | 4                   | 5              | 6                | 7  |
| g) Liver                                                                                                   | 1                | 2             | 3                   | 4                   | 5              | 6                | 7  |
| h) Squid, Octopus,<br>Shrimp, Shellfish                                                                    | 1                | 2             | 3                   | 4                   | 5              | 6                | 7  |
| i) Fatty fish<br>(Sardine, Mackerel, Pacific<br>saury, Yellowtail, Herring,<br>Eel, tuna, Fatty tuna etc.) | 1                | 2             | 3                   | 4                   | 5              | 6                | 7  |
| j) Nonfatty fish<br>(Salmon, Trout, White-<br>flesh fish, freshwater fish,<br>skipjack tuna etc.)          | 1                | 2             | 3                   | 4                   | 5              | 6                | 7  |
| k) Egg                                                                                                     | 1                | 2             | 3                   | 4                   | 5              | 6                | 7  |
| l) Soy                                                                                                     | 1                | 2             | 3                   | 4                   | 5              | 6                | 7  |
| m) Tofu, Fried tofu, Soy<br>milk                                                                           | 1                | 2             | 3                   | 4                   | 5              | 6                | 7  |
| n) Natto                                                                                                   | 1                | 2             | 3                   | 4                   | 5              | 6                | 7  |
| o) Milk                                                                                                    | 1                | 2             | 3                   | 4                   | 5              | 6                | 7  |
| p) Yogurt                                                                                                  | 1                | 2             | 3                   | 4                   | 5              | 6                | 7  |
| q) Dark green vegetables<br>(include Broccoli, bitter<br>melon)                                            | 1                | 2             | 3                   | 4                   | 5              | 6                | 7  |

---

---

Questionnaire of lifestyle habits

We ask your dietary habit in latest approximately one month.

There are a lot of items, please answer the questions with first impression.

How often did have the foods the following a) ~ w) in latest one month?

Please choose suitable one number in each item based on the frequencies and put ○, respectively.

|                                                             | Twice ≤<br>a day | Once<br>a day | 4~6 times<br>a week | 2~3 times<br>a week | Once<br>a week | < Once<br>a week | No |
|-------------------------------------------------------------|------------------|---------------|---------------------|---------------------|----------------|------------------|----|
| r) Cabbage, Napa cabbage                                    | 1                | 2             | 3                   | 4                   | 5              | 6                | 7  |
| s) Carrot, Squash                                           | 1                | 2             | 3                   | 4                   | 5              | 6                | 7  |
| t) Radish, Turnip                                           | 1                | 2             | 3                   | 4                   | 5              | 6                | 7  |
| u) Other vegetables<br>(Onion, Burdock, lotus<br>root etc.) | 1                | 2             | 3                   | 4                   | 5              | 6                | 7  |
| v) Seaweed (all kinds)<br>(exclude soup stock)              | 1                | 2             | 3                   | 4                   | 5              | 6                | 7  |
| w) Mushrooms<br>(All kinds)                                 | 1                | 2             | 3                   | 4                   | 5              | 6                | 7  |

**Table S2.** Results of questionnaire of lifestyle habits.

|                                   | Median | Minimum | Maximum |
|-----------------------------------|--------|---------|---------|
| Environmental factor              |        |         |         |
| Age                               | 70     | 49      | 85      |
| Smoking                           | 0      | 0       | 2       |
| Br index                          | 4.5    | 0       | 1506    |
| BMI (kg/m <sup>2</sup> )          | 23.7   | 18.4    | 31.9    |
| Nutritional factors               |        |         |         |
| Rice                              | 6      | 1       | 7       |
| Bread                             | 6      | 1       | 7       |
| Noodle                            | 4      | 1       | 6       |
| Chicken                           | 4      | 1       | 7       |
| Pork, Beef, Mutton                | 4      | 1       | 7       |
| Processed meat                    | 3      | 1       | 7       |
| Liver                             | 1      | 1       | 5       |
| Squid, Octopus, Shrimp, Shellfish | 2      | 1       | 7       |
| Fatty fish                        | 3      | 1       | 7       |
| Nonfatty fish                     | 4      | 1       | 7       |
| Egg                               | 4      | 1       | 7       |
| Soy                               | 4      | 1       | 7       |
| Tofu                              | 4      | 1       | 7       |
| Natto                             | 4      | 1       | 7       |
| Milk                              | 5      | 1       | 7       |
| Yogurt                            | 5      | 1       | 7       |
| Dark green vegetables             | 4      | 1       | 7       |
| Cabbage, Napa cabbage             | 4      | 1       | 7       |
| Carrot, Squash                    | 4      | 1       | 7       |
| Radish, Turnip                    | 3      | 1       | 7       |
| Other vegetables                  | 5      | 1       | 7       |
| Seaweed                           | 4      | 1       | 7       |
| Mushrooms                         | 4      | 1       | 7       |

The questionnaire included environmental and nutritional factors. Abbreviations: Br index, Brinkman index; BMI, body mass index.

**Table S3.** Frequency of lifestyle habits questionnaire.

|                                |                                    |                           |            |                  |                     |             |                       |    |
|--------------------------------|------------------------------------|---------------------------|------------|------------------|---------------------|-------------|-----------------------|----|
| Environmental<br>questionnaire | Frequency                          | 2                         |            | 1                |                     | 0           |                       |    |
| Smoking                        | Explanation                        | Current smoker            |            | Former smoker    |                     | Non smoker  |                       |    |
| Br index                       | Number of cigarettes (/day) × year |                           |            |                  |                     |             |                       |    |
| Nutritional<br>questionnaire   | Frequency                          | 7                         | 6          | 5                | 4                   | 3           | 2                     | 1  |
| Each item                      | Explanation                        | Not less than twice a day | Once a day | 4–6 times a week | 2 or 3 times a week | Once a week | Less than once a week | No |

Abbreviations: Br index, Brinkman index.

**Table S4.** Standards of diseases by blood biochemical examination items and correlation. Coefficients between blood examination items and nutritional factors.

| Diseases                                         | Blood examination items          |                    |                  | Spearman's Rank-Correlation Coefficient ( $r_s$ ), $0.20 \leq  r_s $ |                                                          |
|--------------------------------------------------|----------------------------------|--------------------|------------------|----------------------------------------------------------------------|----------------------------------------------------------|
|                                                  | Items                            | Standard           | Numbers          | Nutritional Factors                                                  |                                                          |
|                                                  |                                  |                    |                  | Items                                                                | *: $p < 0.05$<br>**: $p < 0.01$                          |
| Heart disease<br>(n = 49)<br>Non<br>(n = 45)     | AST (U/L)<br>(n = 93)            | $30 < \leq 30$     | n = 22<br>n = 71 | Bread                                                                | -0.269 ** (n = 93)                                       |
|                                                  | ALT (U/L)<br>(n = 93)            | $42 < \leq 42$     | n = 8<br>n = 86  | Chicken<br>Milk                                                      | 0.207 * (n = 93)<br>-0.216 * (n = 93)                    |
|                                                  | CK (U/L)<br>(n = 66)             | $248 < \leq 248$   | n = 4<br>n = 62  | Pork, Beef, Mutton<br>Other vegetables                               | -0.257 * (n = 66)<br>-0.252 * (n = 66)                   |
|                                                  | LDH (U/L)<br>(n = 87)            | $222 < \leq 222$   | n = 7<br>n = 80  | N/A                                                                  | -                                                        |
|                                                  | NT-proBNP<br>(pg/ml)<br>(n = 80) | $125 < \leq 125$   | n = 33<br>n = 47 | N/A                                                                  | -                                                        |
| Dyslipidemia<br>(n = 20)<br>Non<br>(n = 74)      | T-Cho<br>(mg/dL)<br>(n = 88)     | $219 < \leq 219$   | n = 9<br>n = 79  | Pork, Beef, Mutton<br>Cabbage, Napa cabbage<br>Radish, Turnip        | 0.218 * (n = 88)<br>0.229 * (n = 88)<br>0.225 * (n = 88) |
|                                                  | LDL (mg/dL)<br>(n = 89)          | $139 < \leq 139$   | n = 5<br>n = 83  | Rice<br>Cabbage, Napa cabbage                                        | -0.228 * (n = 89)<br>0.210 * (n = 89)                    |
|                                                  | TG (mg/dL)<br>(n = 88)           | $149 < \leq 149$   | n = 27<br>n = 61 | N/A                                                                  | -                                                        |
| Kidney disease<br>(n = 35)<br>Non<br>(n = 59)    | UN (mg/dL)<br>(n = 93)           | $20 < \leq 20$     | n = 23<br>n = 70 | Tofu                                                                 | 0.229 * (n = 93)                                         |
|                                                  | CRE (mg/dL)<br>(n = 93)          | $1.07 < \leq 1.07$ | n = 17<br>n = 76 | N/A                                                                  | -                                                        |
|                                                  | UA (mg/dL)<br>(n = 86)           | $7.0 < \leq 7.0$   | n = 9<br>n = 77  | N/A                                                                  | -                                                        |
| Diabetes mellitus<br>(n = 28)<br>Non<br>(n = 66) | HbA1c<br>(%)<br>(n = 77)         | $6.2 < \leq 6.2$   | n = 30<br>n = 47 | Processed meat                                                       | 0.244 * (n = 77)                                         |

Items, standards and objective numbers were shown. Dietary habit by diseases were confirmed by Spearman's rank-correlation coefficients ( $r_s$ ) between blood items and nutritional factors that obtained from score of questionnaires. Student's t distribution was used to compare differences among correlation coefficients (\*  $p < 0.05$ , \*\*  $p < 0.01$ ). Abbreviations: AST, aspartate aminotransferase; ALT, alanine transaminase; CK, creatine kinase; LDH, lactate dehydrogenase; NT-proBNP, N-terminal pro-brain natriuretic peptide; T-cho, total cholesterol; LDL, low density lipoprotein; TG, triacylglycerol; UN, urea nitrogen; CRE, creatinine; UA, uric acid; HbA1c, Hemoglobin A1.

**Table S5.** Differences of clinical parameters, blood biochemical examinations, and nutritional factors between visit dentistry < 6 months and ≥ 6 months.

| Clinical Parameters         |                                     |                                     |                                              | Blood Biochemical Examinations       |                                     |                                     |                                              | Nutritional Factors      |                                     |                                     |                                              |
|-----------------------------|-------------------------------------|-------------------------------------|----------------------------------------------|--------------------------------------|-------------------------------------|-------------------------------------|----------------------------------------------|--------------------------|-------------------------------------|-------------------------------------|----------------------------------------------|
| Group<br>(n = 94)           | Visit<br>Dentistry<br>< 6<br>Months | Visit<br>Dentistry<br>≥ 6<br>Months | Differences<br>Between<br>Groups             | Group<br>(n = as<br>below)           | Visit<br>Dentistry<br>< 6<br>Months | Visit<br>Dentistry<br>≥ 6<br>Months | Differences<br>between<br>Groups             | Group<br>(n = 94)        | Visit<br>Dentistry<br>< 6<br>Months | Visit<br>Dentistry<br>≥ 6<br>Months | Differences<br>between<br>Groups             |
| Variables                   | (n = 49)                            | (n = 45)                            |                                              | Variables                            | (n = as below)                      |                                     |                                              | Variables                | (n = 49)                            | (n = 45)                            |                                              |
| Stage                       | 2.74<br>± 0.97                      | 2.82<br>± 0.91                      | -                                            | AST<br>(U/L)<br>(n = 93)             | 25.5<br>± 8.93<br>(n = 48)          | 24.2<br>± 8.79<br>(n = 45)          | <i>p</i> = 0.47<br>Welch's<br><i>t</i> -test | Noodle                   | 3.59 ± 1.59                         | 3.47 ± 1.39                         | <i>p</i> = 0.69<br>Welch's<br><i>t</i> -test |
| Grade                       | 2.01<br>± 0.75                      | 2.16<br>± 0.67                      | <i>p</i> = 0.52<br>Welch's<br><i>t</i> -test | ALT<br>(U/L)<br>(n = 93)             | 25.6<br>± 16.4<br>(n = 48)          | 21.9<br>± 11.8<br>(n = 45)          | <i>p</i> = 0.22<br><i>t</i> -test            | Pork, Beef,<br>Mutton    | 4.14 ± 1.23                         | 4.02 ± 1.08                         | <i>p</i> = 0.08<br>Welch's<br><i>t</i> -test |
| Number of<br>Teeth          | 22.69<br>± 5.77                     | 22.18<br>± 7.72                     | <i>p</i> = 0.71<br>Welch's<br><i>t</i> -test | CK (U/L)<br>(n = 66)                 | 114.9<br>± 54.9<br>(n = 32)         | 123.1<br>± 70.7<br>(n = 34)         | <i>p</i> = 0.60<br>Welch's<br><i>t</i> -test | Processed<br>meat        | 3.74 ± 1.46                         | 3.29 ± 1.59                         | <i>p</i> = 0.16<br>Welch's<br><i>t</i> -test |
| PD (mm)                     | 2.67<br>± 0.61                      | 2.70<br>± 0.45                      | <i>p</i> = 0.78<br>Welch's<br><i>t</i> -test | LDH<br>(U/L)<br>(n = 87)             | 180.8<br>± 31.8<br>(n = 46)         | 176.5<br>± 27.4<br>(n = 41)         | <i>p</i> = 0.50<br>Welch's<br><i>t</i> -test | Tofu                     | 4.06 ± 1.44                         | 4.47 ± 1.47                         | <i>p</i> = 0.18<br>Welch's<br><i>t</i> -test |
| Rate of PD<br>4–5 mm<br>(%) | 7.08<br>± 9.00                      | 9.24<br>± 11.7                      | <i>p</i> = 0.31<br>Welch's<br><i>t</i> -test | NT-<br>proBNP<br>(pg/ml)<br>(n = 80) | 280.5<br>± 346.5<br>(n = 39)        | 256.7<br>± 377.2<br>(n = 41)        | <i>p</i> = 0.77<br>Welch's<br><i>t</i> -test | Yogurt                   | 4.10 ± 2.07                         | 3.80 ± 2.21                         | <i>p</i> = 0.50<br>Welch's<br><i>t</i> -test |
| Rate of PD<br>≥ 6 mm (%)    | 2.45<br>± 6.51                      | 1.94<br>± 3.85                      | <i>p</i> = 0.31<br>Welch's<br><i>t</i> -test | T-Cho<br>(mg/dL)<br>(n = 88)         | 176.7<br>± 38.7<br>(n = 46)         | 165.8<br>± 30.1<br>(n = 42)         | <i>p</i> = 0.14<br>Welch's<br><i>t</i> -test | Dark green<br>vegetables | 4.45 ± 1.77                         | 3.73 ± 1.88                         | <i>p</i> = 0.06<br>Welch's<br><i>t</i> -test |

|                            |                   |                   |                                         |                            |                              |                              |                                         |                          |             |             |                                         |
|----------------------------|-------------------|-------------------|-----------------------------------------|----------------------------|------------------------------|------------------------------|-----------------------------------------|--------------------------|-------------|-------------|-----------------------------------------|
| CAL (mm)                   | 3.89<br>± 1.15    | 3.89<br>± 1.20    | $p = 0.81$<br>Welch's<br><i>t</i> -test | LDL<br>(mg/dL)<br>(n = 89) | 88.6 ± 28.0<br>(n = 46)      | 84.5<br>± 27.3<br>(n = 43)   | $p = 0.49$<br>Welch's<br><i>t</i> -test | Cabbage,<br>Napa cabbage | 4.55 ± 1.21 | 4.51 ± 1.46 | $p = 0.89$<br>Welch's<br><i>t</i> -test |
| BOP rate<br>(%)            | 15.3<br>± 13.5    | 18.1<br>± 12.7    | $p = 0.31$<br>Welch's<br><i>t</i> -test | TG<br>(mg/dL)<br>(n = 88)  | 144.4<br>± 113.1<br>(n = 48) | 149.8<br>± 123.8<br>(n = 40) | $p = 0.83$<br>Welch's<br><i>t</i> -test | Carrot,<br>Squash        | 3.78 ± 1.65 | 3.79 ± 1.82 | $p = 1.00$<br>Welch's<br><i>t</i> -test |
| PISA<br>(mm <sup>2</sup> ) | 207.9<br>± 215.8  | 252.8<br>± 226.7  | $p = 0.33$<br>Welch's<br><i>t</i> -test | UN<br>(mg/dL)<br>(n = 93)  | 17.1<br>± 5.15<br>(n = 49)   | 17.2<br>± 4.35<br>(n = 44)   | $p = 0.92$<br>Welch's<br><i>t</i> -test | Other<br>vegetables      | 4.59 ± 1.70 | 4.31 ± 1.74 | $p = 0.44$<br>Welch's<br><i>t</i> -test |
| PESA<br>(mm <sup>2</sup> ) | 1126.3<br>± 320.7 | 1106.7<br>± 413.3 | $p = 0.80$<br>Welch's<br><i>t</i> -test | UA<br>(mg/dL)<br>(n = 86)  | 5.79 ± 2.88<br>(n = 46)      | 5.56 ± 1.38<br>(n = 40)      | $p = 0.64$<br><i>t</i> -test            | Mush-<br>rooms           | 3.51 ± 1.47 | 3.49 ± 1.70 | $p = 0.95$<br>Welch's<br><i>t</i> -test |
| PISA<br>/PESA              | 0.173<br>± 0.146  | 0.205<br>± 0.134  | $p = 0.27$<br>Welch's<br><i>t</i> -test | HbA1c<br>(%)<br>(n = 77)   | 6.29 ± 0.86<br>(n = 39)      | 5.96 ± 0.56<br>(n = 38)      | $p = 0.05$<br><i>t</i> -test            |                          |             |             |                                         |

The differences of each parameter were compared by *t*-test or Welch's *t*-test between visit of dentistry groups. Student's *t* distributions were used to compare the differences. Abbreviations: n, number; PD, probing depth; CAL, clinical attachment level; BOP, bleeding on probing; PISA, periodontal inflamed surface area; PESA, periodontal epithelial surface area; AST, aspartate aminotransferase; ALT, alanine transaminase; CK, creatine kinase; LDH, lactate dehydrogenase; NT-proBNP, N-terminal pro-brain natriuretic peptide; T-cho, total cholesterol; LDL, low density lipoprotein; TG, triacylglycerol; UN, urea nitrogen; CRE, creatinine; UA, uric acid; HbA1c, Hemoglobin A1c.

**Table S6.** Correlation coefficient between IL1 $\beta$  in saliva and clinical parameters.

| (n = 94)                 |        | Clinical Parameters |                     |          |                       |                            |          |              |                         |                         |            |
|--------------------------|--------|---------------------|---------------------|----------|-----------------------|----------------------------|----------|--------------|-------------------------|-------------------------|------------|
| Saliva Components        | Stage  | Grade               | Number of Teeth (n) | PD (mm)  | Rate of PD 4–5 mm (%) | Rate of PD $\geq$ 6 mm (%) | CAL (mm) | BOP Rate (%) | PISA (mm <sup>2</sup> ) | PESA (mm <sup>2</sup> ) | PISA /PESA |
| IL1 $\beta$ (ng/ml)      | 0.096  | 0.130               | 0.058               | 0.381 ** | 0.271 *               | 0.317 **                   | 0.213    | 0.353 **     | 0.299 **                | 0.196                   | 0.348 **   |
| IL1 $\beta$ /BCA (ng/ml) | -0.003 | 0.044               | 0.250 *             | 0.212    | 0.112                 | 0.105                      | 0.099    | 0.194        | 0.258 *                 | 0.312 **                | 0.205      |

Correlation coefficients in this panel showed Spearman's rank-correlation coefficient ( $r_s$ ). Eleven periodontal clinical parameters were used for the calculation of the analysis. Boxes in the matrix were painted by color in response to correlation coefficient as shown below. Student's t distribution was used to compare differences among correlation coefficients (\*  $p < 0.05$ , \*\*  $p < 0.01$ ). Abbreviations: IL1 $\beta$ , interleukin 1 $\beta$ ; BCA, bichinchonic acid; PD, probing depth; CAL, clinical attachment level; BOP, bleeding on probing; PISA, periodontal inflamed surface area; PESA, periodontal epithelial surface area.

**Figure S1.** Frequency table of habits questionnaire of nutritional factors.

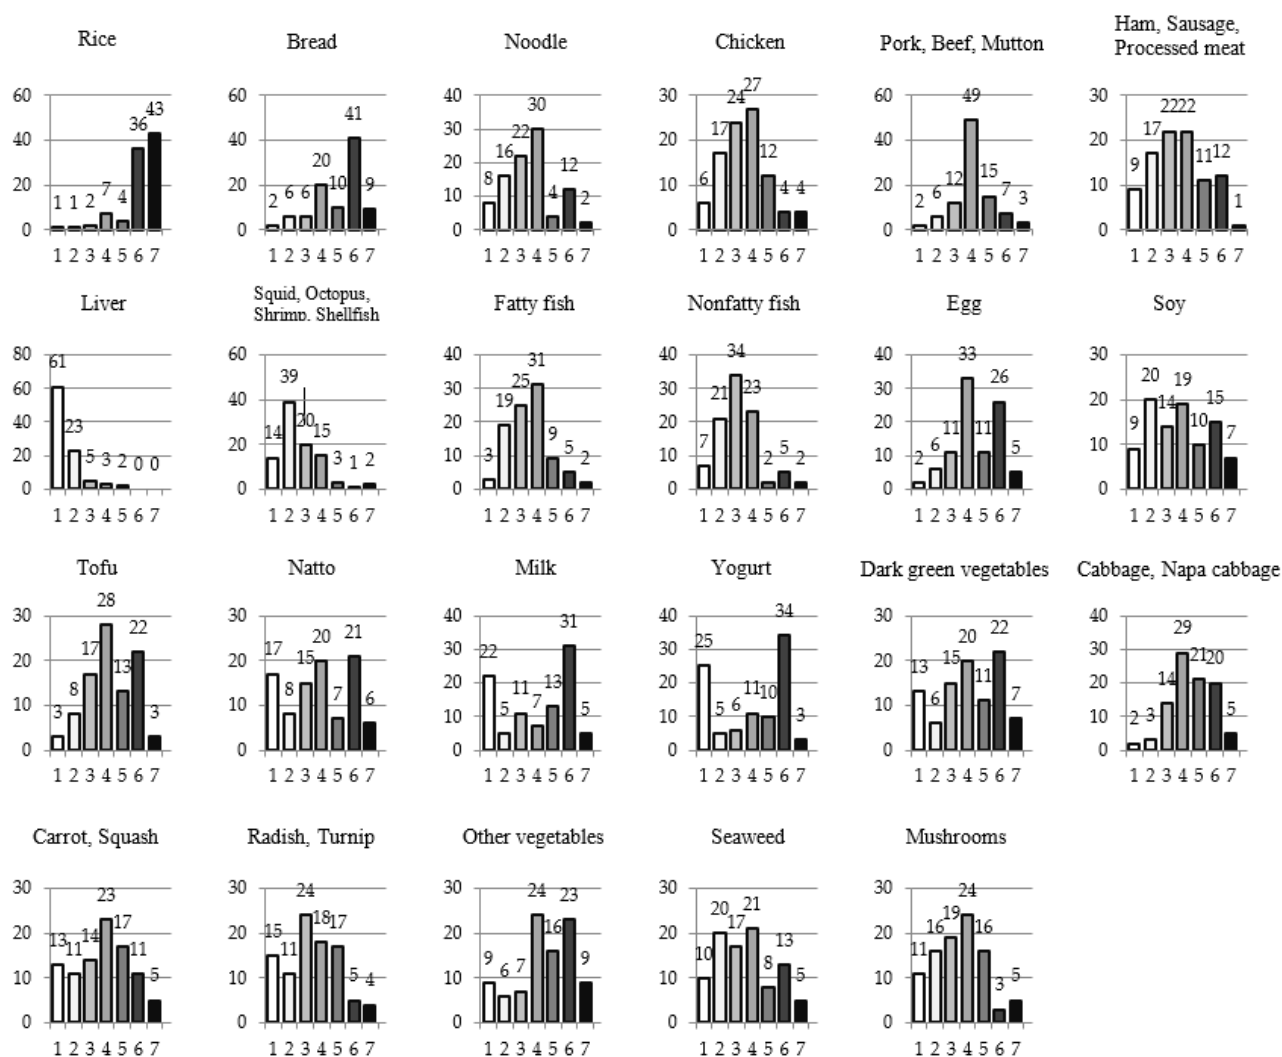

**Figure S2.** Residual plot by Breusch–Pagan & White heteroskedasticity test.

10

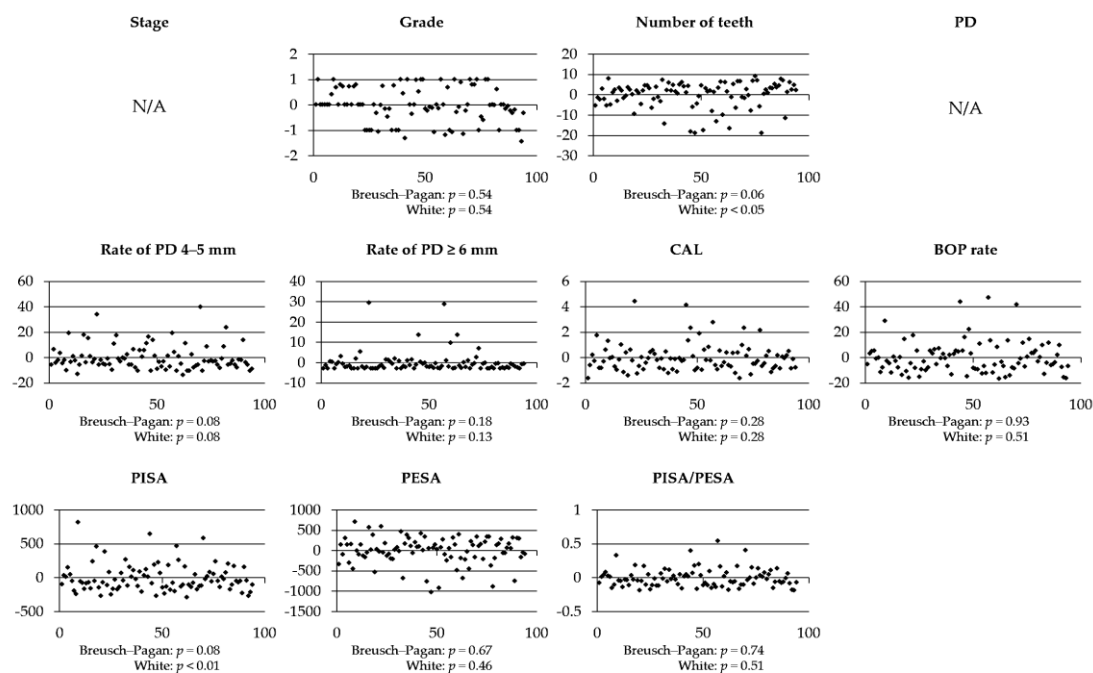

Vertical axis indicates each residual of environmental factors and horizontal axis indicates sample numbers in all graphs.

24

25

**Figure S3.** Residual plot by Breusch–Pagan & White heteroskedasticity test.

26

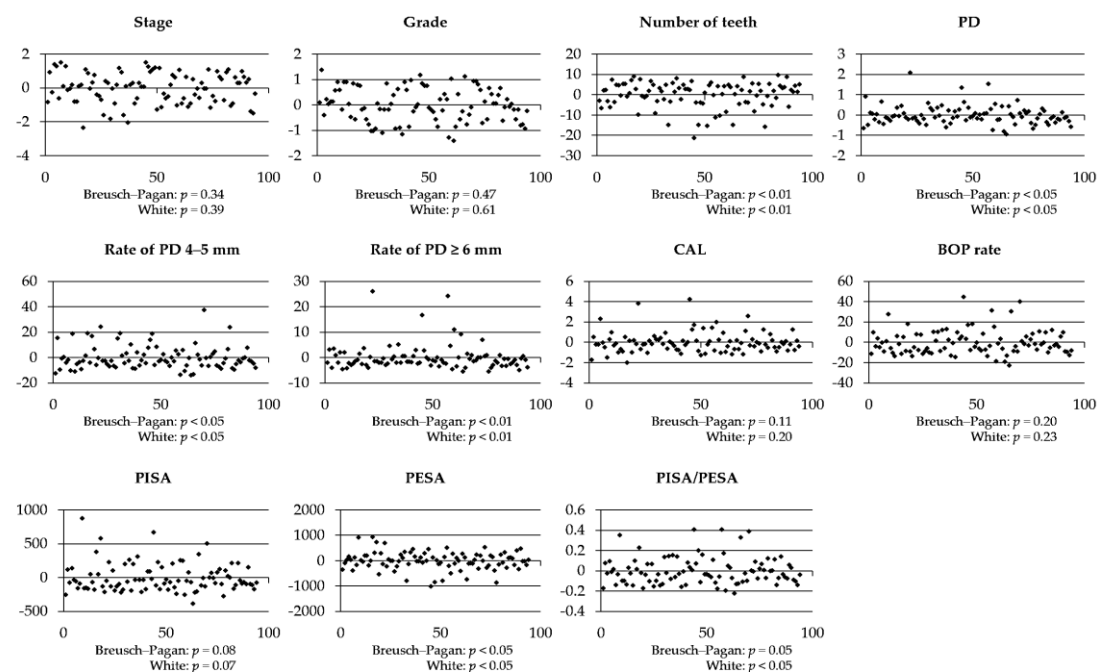

Vertical axis indicates each residual of nutritional factors and horizontal axis indicates sample numbers in all graphs.

40



---
